# Supplementary material
Source: ML conference proceedings conference paper supplement (https://openreview.net/forum?id=e-ZdxsIwweR)
Supplement: supplementary_material [file attachment]

# ROBUST CONSTRAINED REINFORCEMENT LEARNING FOR CONTINUOUS CONTROL WITH MODEL MISSPECIFICATION

**Daniel J. Mankowitz\***  
dmankowitz@google.com

**Dan A. Calian\***  
dancalian@google.com

**Rae Jeong**

**Cosmin Paduraru**

**Nicolas Heess**

**Sumanth Dathathri**

**Martin Riedmiller**

**Timothy Mann**

DeepMind  
London, UK

## ABSTRACT

Many real-world physical control systems are required to satisfy constraints upon deployment. Furthermore, real-world systems are often subject to effects such as non-stationarity, wear-and-tear, uncalibrated sensors and so on. Such effects effectively perturb the system dynamics and can cause a policy trained successfully in one domain to perform poorly when deployed to a perturbed version of the same domain. This can affect a policy’s ability to maximize future rewards as well as the extent to which it satisfies constraints. We refer to this as constrained model misspecification. We present an algorithm that mitigates this form of misspecification, and showcase its performance in multiple simulated Mujoco tasks from the Real World Reinforcement Learning (RWRL) suite.

## 1 INTRODUCTION

Reinforcement Learning (RL) has had a number of recent successes in various application domains which include computer games (Silver et al., 2017; Mnih et al., 2015; Tessler et al., 2017) and robotics (Abdolmaleki et al., 2018a). As RL and deep learning continue to scale, an increasing number of real-world applications may become viable candidates to take advantage of this technology. However, the application of RL to real-world systems is often associated with a number of challenges (Dulac-Arnold et al., 2019; Dulac-Arnold et al., 2020). We will focus on the following two:

**Challenge 1 - Constraint satisfaction:** One such challenge is that many real-world systems have constraints that need to be satisfied upon deployment (i.e., hard constraints); or at least the number of constraint violations as defined by the system need to be reduced as much as possible (i.e., soft-constraints). This is prevalent in applications ranging from physical control systems such as autonomous driving and robotics to user facing applications such as recommender systems.

**Challenge 2 - Model Misspecification (MM):** Many of these systems suffer from another challenge: model misspecification. We refer to the situation in which an agent is trained in one environment but deployed in a different, perturbed version of the environment as an instance of *model misspecification*. This may occur in many different applications and is well-motivated in the literature (Mankowitz et al., 2018; 2019; Derman et al., 2018; 2019; Iyengar, 2005; Tamar et al., 2014).

There has been much work on constrained optimization in the literature (Altman, 1999; Tessler et al., 2018; Efroni et al., 2020; Achiam et al., 2017; Bohez et al., 2019). However, to our knowledge, the effect of model misspecification on an agent’s ability to satisfy constraints at test time has not yet been investigated.

---

\*indicates equal contribution.

**Constrained Model Misspecification (CMM):** We consider the scenario in which an agent is required to satisfy constraints at test time but is deployed in an environment that is different from its training environment (i.e., a perturbed version of the training environment). Deployment in a perturbed version of the environment may affect the return achieved by the agent as well as its ability to satisfy the constraints. We refer to this scenario as *constrained model misspecification*.

This problem is prevalent in many real-world applications where constraints need to be satisfied but the environment is subject to state perturbations effects such as wear-and-tear, partial observability etc., the exact nature of which may be unknown at training time. Since such perturbations can significantly impact the agent’s ability to satisfy the required constraints it is insufficient to simply ensure that constraints are satisfied in the unperturbed version of the environment. Instead, the presence of unknown environment variations needs to be factored into the training process. One area where such considerations are of particular practical relevance is sim2real transfer where the unknown sim2real gap can make it hard to ensure that constraints will be satisfied on the real system (Andrychowicz et al., 2018; Peng et al., 2018; Wulfmeier et al., 2017; Rastogi et al., 2018; Christiano et al., 2016). Of course, one could address this issue by limiting the capabilities of the system being controlled in order to ensure that constraints are never violated, for instance by limiting the amount of current in an electric motor. Our hope is that our methods can outperform these more blunt techniques, while still ensuring constraint satisfaction in the deployment domain.

**Main Contributions:** In this paper, we aim to bridge the two worlds of model misspecification and constraint satisfaction. We present an RL objective that enables us to optimize a policy that aims to be robust to CMM. Our contributions are as follows: **(1)** Introducing the Robust Return Robust Constraint (R3C) and Robust Constraint (RC) RL objectives that aim to mitigate CMM as defined above. This includes the definition of a Robust Constrained Markov Decision Process (RC-MDP). **(2)** Derive corresponding R3C and RC value functions and Bellman operators. Provide an argument showing that these Bellman operators converge to fixed points. These are implemented in the policy evaluation step of actor-critic R3C algorithms. **(3)** Implement five different R3C and RC algorithmic variants on top of D4PG and DMPO, (two state-of-the-art continuous control RL algorithms). **(4)** Empirically demonstrate the superior performance of our algorithms, compared to various baselines, with respect to mitigating CMM. This is shown consistently across 6 different Mujoco tasks from the Real-World RL (RWRL) suite<sup>1</sup>.

## 2 BACKGROUND

### 2.1 MARKOV DECISION PROCESSES

A **Robust Markov Decision Process (R-MDP)** is defined as a tuple  $\langle S, A, R, \gamma, \mathcal{P} \rangle$  where  $S$  is a finite set of states,  $A$  is a finite set of actions,  $R : S \times A \rightarrow \mathbb{R}$  is a bounded reward function and  $\gamma \in [0, 1)$  is the discount factor;  $\mathcal{P}(s, a) \subseteq \mathcal{M}(S)$  is an uncertainty set where  $\mathcal{M}(S)$  is the set of probability measures over next states  $s' \in S$ . This is interpreted as an agent selecting a state and action pair, and the next state  $s'$  is determined by a conditional measure  $p(s'|s, a) \in \mathcal{P}(s, a)$  (Iyengar, 2005). We want the agent to learn a policy  $\pi : S \rightarrow A$ , which is a mapping from states to actions that is robust with respect to this uncertainty set. For the purpose of this paper, we consider deterministic policies, but this can easily be extended to stochastic policies too. The robust value function  $V^\pi : S \rightarrow \mathbb{R}$  for a policy  $\pi$  is defined as  $V^\pi(s) = \inf_{p \in \mathcal{P}(s, \pi(s))} V^{\pi, p}(s)$  where  $V^{\pi, p}(s) = r(s, \pi(s)) + \gamma \sum_{s'} p(s'|s, \pi(s)) V^{\pi, p}(s')$ . A rectangularity assumption on the uncertainty set (Iyengar, 2005) ensures that “nature” can choose a worst-case transition function independently for every state  $s$  and action  $a$ . This means that during a trajectory, at each timestep, nature can choose any transition model from the uncertainty set to reduce the performance of the agent. A robust policy optimizes for the robust (worst-case) expected return objective:  $J_R(\pi) = \inf_{p \in \mathcal{P}} \mathbb{E}^{p, \pi}[\sum_{t=0}^{\infty} \gamma^t r_t]$ .

The robust value function can be expanded as  $V^\pi(s) = r(s, \pi(s)) + \gamma \inf_{p \in \mathcal{P}(s, \pi(s))} \mathbb{E}^p[V^\pi(s')|s, \pi(s)]$ . As in (Tamar et al., 2014), we can define an operator  $\sigma_{\mathcal{P}(s, a)}^{inf} v : \mathbb{R}^{|S|} \rightarrow \mathbb{R}$  as  $\sigma_{\mathcal{P}(s, a)}^{inf} v = \inf_{p \in \mathcal{P}(s, a)} \{p^\top v\}$ . We can also define an operator for some policy  $\pi$  as  $\sigma_\pi^{inf} : \mathbb{R}^{|S|} \rightarrow \mathbb{R}^{|S|}$  where  $\{\sigma_\pi^{inf} v\}(s) = \sigma_{\mathcal{P}(s, \pi(s))}^{inf} v$ . Then, we have defined the Robust Bellman

<sup>1</sup>[https://github.com/google-research/realworldrl\\_suite](https://github.com/google-research/realworldrl_suite)

operator as follows  $T_{\mathcal{R}}^{\pi} V^{\pi} = r^{\pi} + \gamma \sigma_{\pi}^{\text{inf}} V^{\pi}$ . Both the robust Bellman operator  $T_{\mathcal{R}}^{\pi} : \mathcal{R}^{|S|} \rightarrow \mathcal{R}^{|S|}$  for a fixed policy and the optimal robust Bellman operator  $T_{\mathcal{R}}^{\pi*} v(s) = \max_{\pi} T_{\mathcal{R}}^{\pi} v(s)$  have previously been shown to be contractions (Iyengar, 2005).

A **Constrained Markov Decision Process (CMDP)** is an extension to an MDP and consists of the tuple  $\langle S, A, P, R, C, \gamma \rangle$  where  $S, A, R$  and  $\gamma$  are defined as in the MDP above and  $C : S \times A \rightarrow \mathbb{R}^K$  is a mapping from a state  $s$  and action  $a$  to a  $K$  dimensional vector representing immediate costs relating to  $K$  constraint. We use  $K=1$  from here on in and therefore  $C : S \times A \rightarrow \mathbb{R}$ . We refer to the cost for a specific state action tuple  $\langle s, a \rangle$  at time  $t$  as  $c_t(s, a)$ . The solution to a CMDP is a policy  $\pi : S \rightarrow \Delta_A$  that learns to maximize return and satisfy the constraints. The agent aims to learn a policy that maximizes the expected return objective  $J_R^{\pi} = \mathbb{E}[\sum_{t=0}^{\infty} \gamma^t r_t]$  subject to  $J_C^{\pi} = \mathbb{E}[\sum_{t=0}^{\infty} \gamma^t c_t] \leq \beta$  where  $\beta$  is a pre-defined constraint threshold. A number of approaches (Tessler et al., 2018; Bohez et al., 2019) optimize the Lagrange relaxation of this objective  $\min_{\lambda \geq 0} \max_{\theta} J_R^{\pi} - \lambda(J_C^{\pi} - \beta)$  by optimizing the Lagrange multiplier  $\lambda$  and the policy parameters  $\theta$  using alternating optimization. We also define the constraint value function  $V_C^{\pi, p} : S \rightarrow \mathbb{R}$  for a policy  $\pi$  as in (Tessler et al., 2018) where  $V_C^{\pi, p}(s) = c(s, \pi(s)) + \gamma p(s'|s, \pi(s)) V_C^{\pi, p}(s')$ .

## 2.2 CONTINUOUS CONTROL RL ALGORITHMS

We address the CMM problem by modifying two well-known continuous control algorithms by having them optimize the RC and R3C objectives.

The first algorithm is **Maximum A-Posteriori Policy Optimization (MPO)**. This is a continuous control RL algorithm that performs policy iteration using an RL form of expectation maximization (Abdolmaleki et al., 2018a;b). We use the distributional-critic version in Abdolmaleki et al. (2020), which we refer to as DMPO.

The second algorithm is **Distributed Distributional Deterministic Policy Gradient (D4PG)**, which is a state-of-the-art actor-critic continuous control RL algorithm with a deterministic policy (Barth-Maron et al., 2018). It is an incremental improvement to DDPG (Lillicrap et al., 2015) with a distributional critic that is learned similarly to distributional MPO.

## 3 ROBUST CONSTRAINED (RC) OPTIMIZATION OBJECTIVE

We begin by defining a Robust Constrained MDP (RC-MDP). This combines an R-MDP and C-MDP to yield the tuple  $\langle S, A, R, C, \gamma, \mathcal{P} \rangle$  where all of the variables in the tuple are defined in Section 2. We next define two optimization objectives that optimize the RC-MDP. The first variant attempts to learn a policy that is robust with respect to the return as well as constraint satisfaction - Robust Return Robust Constrained (R3C) objective. The second variant is only robust with respect to constraint satisfaction - Robust Constrained (RC) objective.

Prior to defining these objectives, we add some important definitions.

**Definition 1.** The robust constrained value function  $V_C^{\pi} : S \rightarrow \mathbb{R}$  for a policy  $\pi$  is defined as

$$V_C^{\pi}(s) = \sup_{p \in \mathcal{P}(s, \pi(s))} V_C^{\pi, p}(s) = \sup_{p \in \mathcal{P}(s, \pi(s))} \mathbb{E}^{\pi, p} \left[ \sum_{t=0}^{\infty} \gamma^t c_t \right].$$

This value function represents the worst-case sum of constraint penalties over the course of an episode with respect to the uncertainty set  $\mathcal{P}(s, a)$ . We can also define an operator  $\sigma_{\mathcal{P}(s, a)}^{\text{sup}} v : \mathbb{R}^{|S|} \rightarrow \mathbb{R}$  as  $\sigma_{\mathcal{P}(s, a)}^{\text{sup}} v = \sup \{p^{\top} v | p \in \mathcal{P}(s, a)\}$ . In addition, we can define an operator on vectors for some policy  $\pi$  as  $\sigma_{\pi}^{\text{sup}} : \mathbb{R}^{|S|} \rightarrow \mathbb{R}^{|S|}$  where  $\{\sigma_{\pi}^{\text{sup}} v\}(s) = \sigma_{\mathcal{P}(s, \pi(s))}^{\text{sup}} v$ . Then, we can defined the Supremum Bellman operator  $T_{\text{sup}}^{\pi} : \mathcal{R}^{|S|} \rightarrow \mathcal{R}^{|S|}$  as follows  $T_{\text{sup}}^{\pi} V^{\pi} = r^{\pi} + \gamma \sigma_{\pi}^{\text{sup}} V^{\pi}$ . Note that this operator is a contraction since we get the same result if we replace  $T_{\text{inf}}^{\pi}$  with  $T_{\text{sup}}^{\pi}$  and replace  $V$  with  $-V$ . An alternative derivation of the sup operator contraction has also been derived in the Appendix, Section A.3 for completeness.

### 3.0.1 ROBUST RETURN ROBUST CONSTRAINT (R3C) OBJECTIVE

The R3C objective is defined as:

$$\max_{\pi \in \Pi} \inf_{p \in P} \mathbb{E}^{p, \pi} \left[ \sum_t \gamma^t r(s_t, a_t) \right] \text{ s.t. } \sup_{p' \in \mathcal{P}} \mathbb{E}^{p', \pi} \left[ \sum_t \gamma^t c(s_t, a_t) \right] \leq \beta \quad (1)$$

Note, a couple of interesting properties about this objective: (1) it focuses on being robust with respect to the return for a pre-defined set of perturbations; (2) the objective also attempts to be robust with respect to the worst case constraint value for the perturbation set. The Lagrange relaxation form of equation 1 is used to define an R3C value function.

**Definition 2** (R3C Value Function). *For a fixed  $\lambda$ , and using the above-mentioned rectangularity assumption (Iyengar, 2005), the R3C value function for a policy  $\pi$  is defined as the concatenation of two value functions  $\mathbf{V}^\pi = f(\langle V^\pi, V_C^\pi \rangle) = V^\pi - \lambda V_C^\pi$ . This implies that we keep two separate estimates of  $V^\pi$  and  $V_C^\pi$  and combine them together to yield  $\mathbf{V}^\pi$ . The constraint threshold  $\beta$  term offsets the value function, and has no effect on any policy improvement step<sup>2</sup>. As a result, the dependency on  $\beta$  is dropped.*

The next step is to define the R3C Bellman operator. This is presented in Definition 3.

**Definition 3** (R3C Bellman operator). *The R3C Bellman operator is defined as two separate Bellman operators  $T_{R3C}^\pi = \langle T_{inf}^\pi, T_{sup}^\pi \rangle$  where  $T_{inf}^\pi$  is the robust Bellman operator (Iyengar, 2005) and  $T_{sup}^\pi : \mathbb{R}^{|S|} \rightarrow \mathbb{R}^{|S|}$  is defined as the sup Bellman operator. Based on this definition, applying the R3C Bellman operator to  $\mathbf{V}^\pi$  involves applying each of the Bellman operators to their respective value functions. That is,  $T_{R3C}^\pi \mathbf{V} = T_{inf}^\pi V - \lambda T_{sup}^\pi V_C$ .*

It has been previously shown that  $T_{inf}^\pi$  is a contraction with respect to the max norm (Tamar et al., 2014) and therefore converges to a fixed point. We also provided an argument whereby  $T_{sup}^\pi$  is a contraction operator in the previous section as well as in Appendix, A.3. These Bellman operators individually ensure that the robust value function  $V(s)$  and the constraint value function  $V_C(s)$  converge to fixed points. Therefore,  $T_{R3C}^\pi \mathbf{V}$  also converges to a fixed point by construction.

As a result of the above argument, we know that we can apply the R3C Bellman operator in value iteration or policy iteration algorithms in the policy evaluation step. This is achieved in practice by simultaneously learning both the robust value function  $V^\pi(s)$  and the constraint value function  $V_C^\pi(s)$  and combining these estimates to yield  $\mathbf{V}^\pi(s)$ .

*It is useful to note that this structure allows for a flexible framework which can define an objective using different combinations of sup and inf terms, yielding combined Bellman operators that are contraction mappings.* It is also possible to take the mean with respect to the uncertainty set yielding a soft-robust update (Derman et al., 2018; Mankowitz et al., 2019). We do not derive all of the possible combinations of objectives in this paper, but note that the framework provides the flexibility to incorporate each of these objectives. We next define the RC objective.

### 3.0.2 ROBUST CONSTRAINED (RC) OBJECTIVE

The RC objective focuses on being robust with respect to constraint satisfaction and is defined as:

$$\max_{\pi \in \Pi} \mathbb{E}^{\pi, p} \left[ \sum_t \gamma^t r(s_t, a_t) \right] \text{ s.t. } \sup_{p' \in \mathcal{P}} \mathbb{E}^{p', \pi} \left[ \sum_t \gamma^t c(s_t, a_t) \right] < \beta \quad (2)$$

This objective differs from R3C in that it only focuses on being robust with respect to constraint satisfaction. This is especially useful in domains where perturbations are expected to have a significantly larger effect on constraint satisfaction performance compared to return performance. The corresponding value function is defined as in Definition 2, except by replacing the robust value function in the concatenation with the expected value function  $V^{\pi, p}$ . The Bellman operator is also similar to Definition 3, where the expected return Bellman operator  $T^\pi$  replaces  $T_{inf}^\pi$ .

<sup>2</sup>The  $\beta$  term is only used in the Lagrange update in Lemma 1.

### 3.1 LAGRANGE UPDATE

For both objectives, we need to learn a policy that maximizes the return while satisfying the constraint. This involves performing alternating optimization on the Lagrange relaxation of the objective. The optimization procedure alternates between updating the actor/critic parameters and the Lagrange multiplier. For both objectives we have the same gradient update for the Lagrange multiplier:

**Lemma 1** (Lagrange derivative). *The gradient of the Lagrange multiplier  $\lambda$  is  $\frac{\partial}{\partial \lambda} f = -\left(\sup_{p \in \mathcal{P}} \mathbb{E}^{p, \pi} \left[ \sum_t \gamma^t c(s_t, a_t) \right] - \beta\right)$ , where  $f$  is the R3C or RC objective loss.*

This is an intuitive update in that the Lagrange multiplier is updated using the worst-case constraint violation estimate. If the worst-case estimate is larger than  $\beta$ , then the Lagrange multiplier is increased to add more weight to constraint satisfaction and vice versa.

## 4 ROBUST CONSTRAINED POLICY EVALUATION

We now describe how the R3C Bellman operator can be used to perform policy evaluation. This policy evaluation step can be incorporated into any actor-critic algorithm. Instead of optimizing the regular distributional loss (e.g. the C51 loss in Bellemare et al. (2017)), as regular D4PG and DMPO do, we optimize the worst-case distributional loss, which is the distance:  $d\left(\mathbf{r}_t + \gamma \mathbf{V}_{\hat{\theta}}^{\pi_k}(s_{t+1}), \mathbf{V}_{\theta}^{\pi_k}(s_t)\right)$ ,

where  $\mathbf{V}_{\theta}^{\pi_k}(s_t) = \inf_{p \in \mathcal{P}(s_t, \pi(s_t))} \left[ V_{\theta}^{\pi_k}(s_{t+1} \sim p(\cdot | s_t, \pi(s_t))) \right] - \lambda \sup_{p' \in \mathcal{P}(s_t, \pi(s_t))} \left[ V_{C, \theta}^{\pi_k}(s_{t+1} \sim p'(\cdot | s_t, \pi(s_t))) \right]$ ;  $\mathcal{P}(s_t, \pi(s_t))$  is an uncertainty set for the current state  $s_t$  and action  $a_t$ ;  $\pi_k$  is the

current network’s policy, and  $\hat{\theta}$  denotes the target network parameters. The Bellman operators derived in the previous sections are repeatedly applied in this policy evaluation step depending on the optimization objective (e.g., R3C or RC). This would be utilized in the critic updates of D4PG and DMPO. Note that the action value function definition,  $\mathbf{Q}_{\theta}^{\pi_k}(s_t, a_t)$ , trivially follows.

## 5 EXPERIMENTS

We perform all experiments using domains from the Real-World Reinforcement Learning (RWRL) suite<sup>3</sup>, namely `cartpole:{balance, swingup}`, `walker:{stand, walk, run}`, and `quadruped:{walk, run}`. We define a task in our experiments as a 6-tuple  $T = \langle \text{domain}, \text{domain\_variant}, \text{constraint}, \text{safety\_coeff}, \text{threshold}, \text{perturbation} \rangle$  whose elements refer to the domain name, the variant for that domain (i.e. RWRL task), the constraint being considered, the safety coefficient value, the constraint threshold and the type of robustness perturbation being applied to the dynamics respectively. An example task would therefore be:  $T = \langle \text{cartpole}, \text{swingup}, \text{balance\_velocity}, 0.3, 0.115, \text{pole\_length} \rangle$ . In total, we have 6 different tasks on which we test our benchmark agents. The full list of tasks can be found in the Appendix, Table 7. The available constraints per domain can be found in the Appendix B.1.

The baselines used in our paper can be seen in Table 1. C-ALG refers to the reward constrained, non-robust algorithms of the variants that we have adapted based on (Tessler et al., 2018; Anonymous, 2020); RC-ALG refers to the robust constraint algorithms corresponding to the Bellman operator  $T_{RC}^{\pi}$ ; R3C-ALG refers to the robust return robust constrained algorithms corresponding to the Bellman operator  $T_{R3C}^{\pi}$ ; SR3C-ALG refers to the soft robust (with respect to return) robust constraint algorithms and R-ALG refers to the robust return algorithms based on Mankowitz et al. (2019).

### 5.1 EXPERIMENTAL SETUP

For each task, the action and observation dimensions are shown in the Appendix, Table 6. The length of an episode is 1000 steps and the upper bound on reward is 1000 (Tassa et al., 2018). All the

<sup>3</sup>[https://github.com/google-research/realworldrl\\_suite](https://github.com/google-research/realworldrl_suite)

| Baseline Algorithm | Variants           | Baseline Description                   |
|--------------------|--------------------|----------------------------------------|
| C-ALG              | C-D4PG, C-DMPO     | Constraint aware, non-robust.          |
| RC-ALG             | RC-D4PG, RC-DMPO   | Robust constraint.                     |
| R3C-ALG            | R3C-D4PG, R3C-DMPO | Robust return robust constraint.       |
| R-ALG              | R-D4PG, R-DMPO     | Robust return.                         |
| SR3C-ALG           | SR3C-D4PG          | Soft robust return, robust constraint. |

Table 1: The baseline algorithms used in this work.

network architectures are the same per algorithm and approximately the same across algorithms in terms of the layers and the number of parameters. A full list of all the network architecture details can be found in the Appendix, Table 4. All runs are averaged across 5 seeds.

**Metrics:** We use three metrics to track overall performance, namely: **return**  $R$ , **overshoot**  $\psi_{\beta,C}$  and **penalized return**  $R_{penalized}$ . The return is the sum of rewards the agent receives over the course of an episode. The constraint overshoot  $\psi_{\beta,C} = \max(0, J_C^\pi - \beta)$  is defined as the clipped difference between the average costs over the course of an episode  $J_C^\pi$  and the constraint threshold  $\beta$ . The penalized return is defined as  $R_{penalized} = R - \bar{\lambda}\psi_{\beta,C}$  where  $\bar{\lambda} = 1000$  is an evaluation weight and equally trades off return with constraint overshoot  $\psi_{\beta,C}$ .

**Constraint Experiment Setup:** The *safety coefficient* is a flag in the RWRL suite (Dulac-Arnold et al., 2020) that determines how easy/difficult it is in the environment to violate constraints. The safety coefficient values range from 0.0 (easy to violate constraints) to 1.0 (hard to violate constraints). As such we selected for each task (1) a safety coefficient of 0.3; (2) a particular constraint supported by the RWRL suite and (3) a corresponding constraint threshold  $\beta$ , which ensures that the agent can find feasible solutions (i.e., satisfy constraints) and solve the task.

**Robustness Experimental Setup:** The robust/soft-robust agents (R3C and RC variants) are trained using a pre-defined uncertainty set consisting of 3 task perturbations (this is based on the results from Mankowitz et al. (2019)). Each perturbation is a different instantiation of the Mujoco environment. The agent is then evaluated on a set of 9 hold-out task perturbations (10 for quadruped). For example, if the task is  $T = \langle \text{cartpole}, \text{swingup}, \text{balance\_velocity}, 0.3, 0.115, \text{pole\_length} \rangle$ , then the agent will have three pre-defined pole length perturbations for training, and evaluate on nine unseen pole lengths, while trying to satisfy the balance velocity constraint.

**Training Procedure:** All agents are always acting on the unperturbed environment. This corresponds to the default environment in the dm\_control suite (Tassa et al., 2018) and is referred to in the experiments as the nominal environment. When the agent acts, it generates next state realizations for the nominal environment as well as each of the perturbed environments in the training uncertainty set to generate the tuple  $\langle s, a, r, [s', s'_1, s'_2 \dots s'_N] \rangle$  where  $N$  is the number of environments in the training uncertainty set and  $s'_i$  is the next state realization corresponding to the  $i^{th}$  perturbed training environment. Since the robustness update is incorporated into the policy evaluation stage of each algorithm, the critic loss which corresponds to the TD error in each case is modified as follows: when computing the target, the learner samples a tuple  $\langle s, a, r, [s', s'_1, s'_2 \dots s'_N] \rangle$  from the experience replay. The target action value function for each next state transition  $[s', s'_1, s'_2 \dots s'_N]$  is then computed by taking the  $\inf$  (robust), average (soft-robust) or the nominal value (non-robust). In each case separate action-value functions are trained for the return  $Q(s, a)$  and the constraint  $Q_C(s, a)$ . These value function estimates then individually return the *mean*, *inf*, *sup* value, depending on the technique, and are combined to yield the target to compute  $\mathbf{Q}(s, a)$ .

The chosen values of the uncertainty set and evaluation set for each domain can be found in Appendix, Table 8. Note that it is common practice to manually select the pre-defined uncertainty set and the unseen test environments. Practitioners often have significant domain knowledge and can utilize this when choosing the uncertainty set (Derman et al., 2019; 2018; Di Castro et al., 2012; Mankowitz et al., 2018; Tamar et al., 2014).

## 5.2 MAIN RESULTS

In the first sub-section we analyze the sensitivity of a fixed constrained policy (trained using C-D4PG) operating in perturbed versions of a given environment. This will help test the hypothesis that perturbing the environment does indeed have an effect on constraint satisfaction as well as on return. In the next sub-section we analyze the performance of the R3C and RC variants with respect to the baseline algorithms.

| Base | Algorithm       | $R$                                  | $R_{penalized}$ | $\max(0, J_C^\pi - \beta)$         |
|------|-----------------|--------------------------------------|-----------------|------------------------------------|
| D4PG | C-D4PG          | 673.21 $\pm$ 93.04                   | 491.450         | 0.18 $\pm$ 0.053                   |
|      | R-D4PG          | 707.79 $\pm$ 65.00                   | 542.022         | 0.17 $\pm$ 0.046                   |
|      | <b>R3C-D4PG</b> | <b>734.45 <math>\pm</math> 77.93</b> | <b>635.246</b>  | <b>0.10 <math>\pm</math> 0.049</b> |
|      | RC-D4PG         | 684.30 $\pm$ 83.69                   | 578.598         | 0.11 $\pm$ 0.050                   |
|      | SR3C-D4PG       | 723.11 $\pm$ 84.41                   | 601.016         | 0.12 $\pm$ 0.038                   |
| DMPO | C-MPO           | 598.75 $\pm$ 72.67                   | 411.376         | 0.19 $\pm$ 0.049                   |
|      | R-MPO           | 686.13 $\pm$ 86.53                   | 499.581         | 0.19 $\pm$ 0.036                   |
|      | <b>R3C-MPO</b>  | <b>752.47 <math>\pm</math> 57.10</b> | <b>652.969</b>  | <b>0.10 <math>\pm</math> 0.040</b> |
|      | RC-MPO          | 673.98 $\pm$ 80.91                   | 555.809         | 0.12 $\pm$ 0.036                   |

Table 2: Performance metrics averaged over all holdout sets for all tasks.

### 5.2.1 FIXED POLICY SENSITIVITY

In order to validate the hypothesis that perturbing the environment affects constraint satisfaction and return, we trained a C-D4PG agent to satisfy constraints across 10 different tasks. In each case, C-D4PG learns to solve the task and satisfy the constraints in expectation. We then perturbed each of the tasks with a supported perturbation and evaluated whether the constraint overshoot increases and the return decreases for the C-D4PG agent. Some example graphs are shown in Figure 1 for the `cartpole` (left), `quadruped` (middle) and `walker` (right) domains. The upper row of graphs contain the return performance (blue curve), the penalized return performance (orange curve) as a function of increased perturbations (x-axis). The vertical red dotted line indicates the nominal model on which the C-D4PG agent was trained. The lower row of graphs contain the constraint overshoot (green curve) as a function of varying perturbations. As seen in the figures, as perturbations increase across each dimension, both the return and penalized return degrades (top row) while the constraint overshoot (bottom row) increases. This provides useful evidence for our hypothesis that constraint satisfaction does indeed suffer as a result of perturbing the environment dynamics. This was consistent among many more settings. The full performance plots can be found in the Appendix, Figures 3, 4 and 5 for `cartpole`, `quadruped` and `walker` respectively.

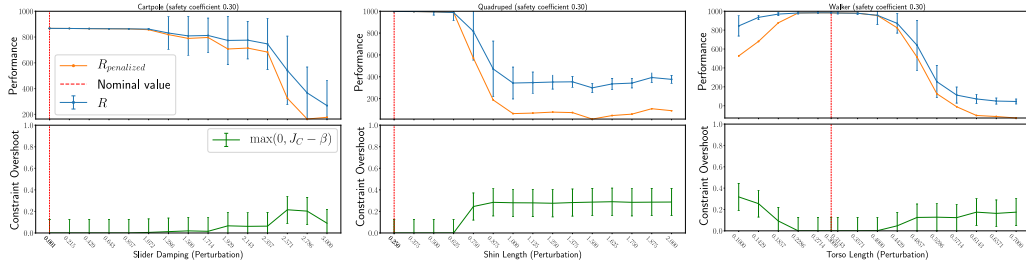Figure 1: The effect on constraint satisfaction and return as perturbations are added to `cartpole`, `quadruped` and `walker` for a fixed C-D4PG policy.

### 5.2.2 ROBUST CONSTRAINED RESULTS

We now compare C-ALG, RC-ALG, R3C-ALG, R-ALG and SR3C-ALG<sup>4</sup> across 6 tasks. The average performance across holdout sets and tasks is shown in Table 2. As seen in the table, the R3C-ALG variant outperforms all of the baselines in terms of return and constraint overshoot and therefore obtains the highest penalized return performance. Interestingly, the soft-robust variant yields competitive performance.

We further analyze the results for three tasks using ALG=D4PG on the (left column) and ALG=DMPO (right column) in Figure 2. The three tasks are  $T_{cartpole, slider\_damping} = \langle \text{cartpole}, \text{swingup}, \text{balance\_velocity}, 0.3, 0.115, \text{slider\_damping} \rangle$  (top row),  $T_{cartpole, pole\_mass} = \langle \text{cartpole}, \text{swingup}, \text{balance\_velocity}, 0.3, 0.115, \text{pole\_mass} \rangle$  (middle row) and  $T_{walker} = \langle \text{walker}, \text{walk}, \text{joint\_velocity}, 0.3, 0.1, \text{torso\_length} \rangle$  (bottom row). Graphs of the additional tasks can be found in the Appendix, Figures 6 and 7. Each graph contains, on the y-axis, the return  $R$  (marked by the transparent colors) and the penalized return  $R_{penalized}$  (marked by the dark

<sup>4</sup>We only ran the SR3C-D4PG variant to gain intuition as to soft-robust performance.

colors superimposed on top of  $R$ ). The x-axis consists of three holdout set environments in increasing order of difficulty from *Holdout 0* to *Holdout 8*. Holdout N corresponds to perturbation element N for the corresponding task in the Appendix, Table 8. As can be seen for  $T_{\text{cartpole,slider damping}}$  and  $T_{\text{cartpole,pole mass}}$  (Figure 2 (top and middle rows respectively)), R3C-D4PG outperforms the baselines, especially as the perturbations increase, the penalized return for these techniques is significantly higher than that of the baselines. This implies that the amount of constraint violations is significantly lower for these algorithms resulting in robust constraint satisfaction.  $T_{\text{walker}}$  (bottom row) has similar performance improved performance over the baseline algorithms.

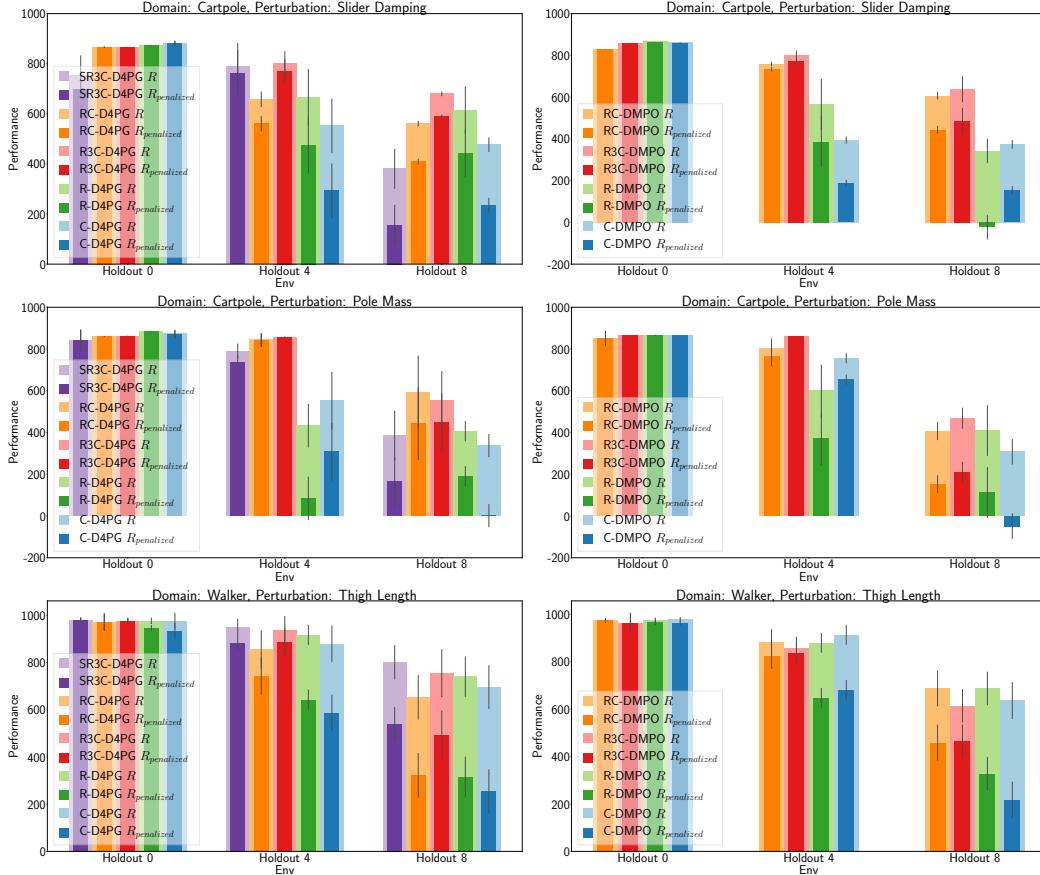

Figure 2: The holdout set performance of the baseline algorithms on D4PG variants (left) and DMPO variants (right) for Cartpole with pole mass perturbations (top row) and walker with thigh length perturbations (bottom row).

## 6 CONCLUSION

This paper simultaneously addresses constraint satisfaction and robustness to state perturbations, two important challenges of real-world reinforcement learning. We present two RL objectives, R3C and RC, that yield robustness to constraints under the presence of state perturbations. We define R3C and RC Bellman operators to ensure that value-based RL algorithms will converge to a fixed point when optimizing these objectives. We then show that when incorporating this into the policy evaluation step of two well-known state-of-the-art continuous control RL algorithms the agent outperforms the baselines on 6 Mujoco tasks. In related work, Everett et al. (2020) considers the problem of being verifiably robust to an adversary that can perturb the state  $s' \in S$  to degrade performance as measured by a Q-function. Dathathri et al. (2020) consider the problem of learning agents (in deterministic environments with known dynamics) that satisfy constraints under perturbations to states  $s' \in S$ . In contrast, equation 1 considers the general problem of learning agents that optimize for the return while satisfying constraints for a given RC-MDP.



## REFERENCES

- Abbas Abdolmaleki, Jost Tobias Springenberg, Jonas Degraeve, Steven Bohez, Yuval Tassa, Dan Belov, Nicolas Heess, and Martin A. Riedmiller. Relative entropy regularized policy iteration. *CoRR*, abs/1812.02256, 2018a.
- Abbas Abdolmaleki, Jost Tobias Springenberg, Yuval Tassa, Remi Munos, Nicolas Heess, and Martin Riedmiller. Maximum a posteriori policy optimisation. *arXiv preprint arXiv:1806.06920*, 2018b.
- Abbas Abdolmaleki, Sandy H. Huang, Leonard Hasenclever, Michael Neunert, H. Francis Song, Martina Zambelli, Murilo F. Martins, Nicolas Heess, Raia Hadsell, and Martin Riedmiller. A distributional view on multi-objective policy optimization. *arXiv preprint arXiv:2005.07513*, 2020.
- Joshua Achiam, David Held, Aviv Tamar, and Pieter Abbeel. Constrained policy optimization. In *Proceedings of the 34th International Conference on Machine Learning-Volume 70*, pp. 22–31. JMLR. org, 2017.
- Eitan Altman. *Constrained Markov decision processes*, volume 7. CRC Press, 1999.
- Marcin Andrychowicz, Bowen Baker, Maciek Chociej, Rafal Jozefowicz, Bob McGrew, Jakub Pachocki, Arthur Petron, Matthias Plappert, Glenn Powell, Alex Ray, et al. Learning dexterous in-hand manipulation. *arXiv preprint arXiv:1808.00177*, 2018.
- Anonymous. Balancing Constraints and Rewards with Meta-Gradients D4PG. 2020.
- Gabriel Barth-Maron, Matthew W Hoffman, David Budden, Will Dabney, Dan Horgan, Dhruva Tb, Alistair Muldal, Nicolas Heess, and Timothy Lillicrap. Distributed distributional deterministic policy gradients. *arXiv preprint arXiv:1804.08617*, 2018.
- Marc G Bellemare, Will Dabney, and Rémi Munos. A distributional perspective on reinforcement learning. In *Proceedings of the 34th International Conference on Machine Learning-Volume 70*, pp. 449–458. JMLR. org, 2017.
- Steven Bohez, Abbas Abdolmaleki, Michael Neunert, Jonas Buchli, Nicolas Heess, and Raia Hadsell. Value constrained model-free continuous control. *arXiv preprint arXiv:1902.04623*, 2019.
- Paul F. Christiano, Zain Shah, Igor Mordatch, Jonas Schneider, Trevor Blackwell, Joshua Tobin, Pieter Abbeel, and Wojciech Zaremba. Transfer from simulation to real world through learning deep inverse dynamics model. *CoRR*, abs/1610.03518, 2016.
- Sumanth Dathathri, Johannes Welbl, Krishnamurthy (Dj) Dvijotham, Ramana Kumar, Aditya Kanade, Jonathan Uesato, Sven Gowal, Po-Sen Huang, and Pushmeet Kohli. Scalable neural learning for verifiable consistency with temporal specifications, 2020.
- Esther Derman, Daniel J Mankowitz, Timothy A Mann, and Shie Mannor. Soft-robust actor-critic policy-gradient. *arXiv preprint arXiv:1803.04848*, 2018.
- Esther Derman, Daniel J Mankowitz, Timothy A Mann, and Shie Mannor. A bayesian approach to robust reinforcement learning. In *Association for Uncertainty in Artificial Intelligence*, 2019.
- Dotan Di Castro, Aviv Tamar, and Shie Mannor. Policy gradients with variance related risk criteria. *arXiv preprint arXiv:1206.6404*, 2012.
- Gabriel Dulac-Arnold, Daniel J. Mankowitz, and Todd Hester. Challenges of real-world reinforcement learning. *CoRR*, abs/1904.12901, 2019.
- Gabriel Dulac-Arnold, Nir Levine, Daniel J Mankowitz, Jerry Li, Cosmin Paduraru, Sven Gowal, and Todd Hester. An empirical investigation of the challenges of real-world reinforcement learning. *arXiv preprint arXiv:2003.11881*, 2020.
- Yonathan Efroni, Shie Mannor, and Matteo Pirodda. Exploration-exploitation in constrained mdps, 2020.
- Michael Everett, Bjorn Lutjens, and Jonathan P. How. Certified adversarial robustness for deep reinforcement learning, 2020.
- Garud N Iyengar. Robust dynamic programming. *Mathematics of Operations Research*, 30(2):257–280, 2005.
- Timothy P Lillicrap, Jonathan J Hunt, Alexander Pritzel, Nicolas Heess, Tom Erez, Yuval Tassa, David Silver, and Daan Wierstra. Continuous control with deep reinforcement learning. *arXiv preprint arXiv:1509.02971*, 2015.

- Daniel J Mankowitz, Timothy A Mann, Pierre-Luc Bacon, Doina Precup, and Shie Mannor. Learning robust options. In *Thirty-Second AAAI Conference on Artificial Intelligence*, 2018.
- Daniel J. Mankowitz, Nir Levine, Rae Jeong, Abbas Abdolmaleki, Jost Tobias Springenberg, Timothy A. Mann, Todd Hester, and Martin A. Riedmiller. Robust reinforcement learning for continuous control with model misspecification. *CoRR*, abs/1906.07516, 2019.
- Volodymyr Mnih, Koray Kavukcuoglu, David Silver, Andrei A. Rusu, Joel Veness, Marc G. Bellemare, Alex Graves, Martin Riedmiller, Andreas K. Fidjeland, Georg Ostrovski, Stig Petersen, Charles Beattie, Amir Sadik, Ioannis Antonoglou, Helen King, Dhharshan Kumaran, Daan Wierstra, Shane Legg, and Demis Hassabis. Human-level control through deep reinforcement learning. *Nature*, 518(7540):529–533, 2015.
- Xue Bin Peng, Marcin Andrychowicz, Wojciech Zaremba, and Pieter Abbeel. Sim-to-real transfer of robotic control with dynamics randomization. In *2018 IEEE International Conference on Robotics and Automation (ICRA)*, pp. 1–8. IEEE, 2018.
- Divyam Rastogi, Ivan Koryakovskiy, and Jens Kober. Sample-efficient reinforcement learning via difference models. In *Machine Learning in Planning and Control of Robot Motion Workshop at ICRA*, 2018.
- David Silver, Julian Schrittwieser, Karen Simonyan, Ioannis Antonoglou, Aja Huang, Arthur Guez, Thomas Hubert, Lucas Baker, Matthew Lai, Adrian Bolton, Yutian Chen, Timothy Lillicrap, Fan Hui, Laurent Sifre, George van den Driessche, Thore Graepel, and Demis Hassabis. Mastering the game of Go without human knowledge. *Nature*, 550, 2017.
- Aviv Tamar, Shie Mannor, and Huan Xu. Scaling up robust mdps using function approximation. In *International Conference on Machine Learning*, pp. 181–189, 2014.
- Yuval Tassa, Yotam Doron, Alistair Muldal, Tom Erez, Yazhe Li, Diego de Las Casas, David Budden, Abbas Abdolmaleki, Josh Merel, Andrew Lefrancq, Timothy P. Lillicrap, and Martin A. Riedmiller. Deepmind control suite. *CoRR*, abs/1801.00690, 2018.
- Chen Tessler, Shahar Givony, Tom Zahavy, Daniel J Mankowitz, and Shie Mannor. A deep hierarchical approach to lifelong learning in minecraft. In *AAAI*, volume 3, pp. 6, 2017.
- Chen Tessler, Daniel J Mankowitz, and Shie Mannor. Reward constrained policy optimization. *arXiv preprint arXiv:1805.11074*, 2018.
- Markus Wulfmeier, Ingmar Posner, and Pieter Abbeel. Mutual alignment transfer learning. *arXiv preprint arXiv:1707.07907*, 2017.

## A PROOFS

### A.1 LAGRANGE MULTIPLIER GRADIENT

*Proof.*

$$\frac{\partial}{\partial \lambda} \inf_{p \in P} \mathbb{E}^{p, \pi} \left[ \sum_t \gamma^t r(s_t, a_t) \right] - \lambda \left( \sup_{p \in \mathcal{P}} \mathbb{E}^{p, \pi} \left[ \sum \gamma c(s_t, a_t) \right] - \beta \right) \quad (3)$$

$$= - \left( \sup_{p \in \mathcal{P}} \mathbb{E}^{p, \pi} \left[ \sum \gamma c(s_t, a_t) \right] - \beta \right) \quad (4)$$

$$\min_{\lambda \geq 0} \max_{\pi \in \Pi} \inf_{p \in P} \mathbb{E}^{p, \pi} \left[ \sum_t \gamma^t r(s_t, a_t) \right] - \lambda \left( \sup_{p \in \mathcal{P}} \mathbb{E}^{p, \pi} \left[ \sum \gamma c(s_t, a_t) \right] - \beta \right) \quad (5)$$

$$\frac{\partial}{\partial \lambda} \inf_{p \in P} \mathbb{E}^{p, \pi} \left[ \sum_t \gamma^t r(s_t, a_t) \right] - \lambda \left( \sup_{p \in \mathcal{P}} \mathbb{E}^{p, \pi} \left[ \sum \gamma c(s_t, a_t) \right] - \beta \right) \quad (6)$$

$$= - \left( \sup_{p \in \mathcal{P}} \mathbb{E}^{p, \pi} \left[ \sum \gamma c(s_t, a_t) \right] - \beta \right) \quad (7)$$

□

### A.2 THE R3C VALUE FUNCTION

$$\begin{aligned} \mathbf{V}^\pi(s) &= V^\pi(s) - \lambda V_C^\pi(s) \\ &= \inf_{p \in P} \mathbb{E}^{p, \pi} \left[ r(s, \pi(s)) + \gamma V^\pi(s') \right] - \lambda \left[ \sup_{p' \in P} \mathbb{E}^{p', \pi} \left[ c(s, \pi(s)) + \gamma V_C^\pi(s') \right] \right] \\ &= \left[ r(s, \pi(s)) + \gamma \inf_{p \in P} \mathbb{E}^{p, \pi} \left( V^\pi(s') \right) \right] - \lambda \left[ \left[ c(s, \pi(s)) + \gamma \sup_{p' \in P} \mathbb{E}^{p', \pi} \left( V_C^\pi(s') \right) \right] \right] \\ &= r(s, \pi(s)) - \lambda c(s, \pi(s)) + \gamma \inf_{p \in P} \mathbb{E}^{p, \pi} \left( V^\pi(s') \right) - \lambda \gamma \sup_{p' \in P} \mathbb{E}^{p', \pi} \left( V_C^\pi(s') \right) \\ &= r(s, \pi(s)) - \lambda c(s, \pi(s)) + \gamma \left[ \sigma_{\mathcal{P}(s, \pi(s))}^{inf} V^\pi - \lambda \sigma_{\mathcal{P}(s, \pi(s))}^{sup} V_C^\pi \right] \\ &= \mathbf{r}(s, \pi(s)) + \gamma \left[ \sigma_{\mathcal{P}(s, \pi(s))}^{inf} V^\pi - \lambda \sigma_{\mathcal{P}(s, \pi(s))}^{sup} V_C^\pi \right] \end{aligned}$$

### A.3 SUP BELLMAN OPERATOR

The R3C Bellman operator can be defined in terms of two separate Bellman operators:  $T_{R3C}^\pi \mathbf{V}(s) = T_{inf}^\pi V(s) - \lambda T_{sup}^\pi V_C(s)$  where  $T_{inf}^\pi : \mathbb{R}^{|S|} \rightarrow \mathbb{R}^{|S|}$  is the robust Bellman operator and  $T_{sup}^\pi : \mathbb{R}^{|S|} \rightarrow \mathbb{R}^{|S|}$  is defined as the sup Bellman operator. These are defined as follows:

$$T_{inf}^\pi V(s) = r(s, \pi(s)) + \gamma \left[ \inf_{p \in P} \mathbb{E}^{p, \pi} \left( V(s') \right) \right] \quad (8)$$

It has been previously shown that  $T_{inf}^\pi$  is a contraction with respect to the max norm (Tamar et al., 2014) and therefore converges to a fixed point. It remains to be shown that  $T_{sup}^\pi$  is a contraction operator and that the R3C Bellman operator is a contraction operator.

$$T_{sup}^\pi V_C(s) = c(s, \pi(s)) + \gamma \left[ \sup_{p \in P} \mathbb{E}^{p, \pi} \left( V_C(s') \right) \right] \quad (9)$$

**Theorem 2** (Sup Bellman operator contraction). *For two arbitrary value functions  $U : S \rightarrow \mathbb{R}$  and  $V : S \rightarrow \mathbb{R}$ , we can show that the sup Bellman operator  $\mathcal{T}_{sup}^\pi : \mathbb{R}^{|S|} \rightarrow \mathbb{R}^{|S|}$  is a contraction. That is*

$$\|\mathcal{T}_{sup}^\pi U - \mathcal{T}_{sup}^\pi V\|_\infty \leq \gamma \|U - V\|_\infty \quad (10)$$

*Proof.* We follow the proofs from (Tamar et al., 2014; Iyengar, 2005), Let  $U, V \in \mathbb{R}^{|S|}$ , and  $s \in S$  an arbitrary state. Assume  $\mathcal{T}_{sup}^\pi U(s) \geq \mathcal{T}_{sup}^\pi V(s)$ . Let  $\epsilon > 0$  be an arbitrary positive number.

By the definition of the sup operator, there exists  $p_s \in \mathcal{P}$  such that,

$$c(s, a) + \gamma \sup_{p \in \mathcal{P}} \mathbb{E}_{a \sim \pi(\cdot|s)} U(s') < c(s, a) + \gamma \mathbb{E}_{s' \sim p_s(\cdot|s, a)} U(s') + \epsilon \quad (11)$$

In addition, we have by definition that:

$$c(s, a) + \gamma \sup_{p \in \mathcal{P}} \mathbb{E}_{a \sim \pi(\cdot|s)} V(s') > c(s, a) + \gamma \mathbb{E}_{s' \sim p_s(\cdot|s, a)} V(s') \quad (12)$$

Thus, we have,

$$\begin{aligned} 0 &\leq \mathcal{T}_{sup}^\pi U(s) - \mathcal{T}_{sup}^\pi V(s) \\ &< \mathbb{E}_{a \sim \pi(\cdot|s)} [c(s, a) + \gamma \mathbb{E}_{s' \sim p_s(\cdot|s, a)} U(s')] + \epsilon - \left[ \mathbb{E}_{a \sim \pi(\cdot|s)} [c(s, a) + \gamma \mathbb{E}_{s' \sim p_s(\cdot|s, a)} V(s')] \right] \\ &= \mathbb{E}_{a \sim \pi(\cdot|s), s' \sim p_s(\cdot|s, a)} [\gamma U(s')] - \mathbb{E}_{a \sim \pi(\cdot|s), s' \sim p_s(\cdot|s, a)} [\gamma V(s')] + \epsilon \\ &\leq \gamma |U(s') - V(s')| + \epsilon \\ &\leq \gamma \|U - V\|_\infty + \epsilon \end{aligned} \quad (13)$$

Applying a similar argument for the case:  $\mathcal{T}^\pi \tilde{U}(s) \leq \mathcal{T}^\pi \tilde{V}(s)$  results in:

$$|\mathcal{T}^\pi U(s) - \mathcal{T}^\pi V(s)|_\infty \leq \gamma \|U - V\|_\infty + \epsilon \quad (14)$$

Since  $\epsilon$  is arbitrary, we establish the result:

$$\|\mathcal{T}^\pi U - \mathcal{T}^\pi V\|_\infty \leq \gamma \|U - V\|_\infty \quad (15)$$

□

The previous two contraction mappings ensure that  $V(s)$  and  $V_C(s)$  converge to fixed points. However, in order to prove that the combination converges to a unique fixed point, we need to prove that  $\mathcal{T}_{RC}^\pi$  is a contraction mapping.

## B EXPERIMENTS

### B.1 CONSTRAINT DEFINITIONS

The per-domain safety constraints of the Real-World Reinforcement Learning (RWRL) suite that we use in the paper are given in Table 3.

### B.2 HYPERPARAMETERS

The hyperparameters used for all variants of D4PG can be found in Table 4. The hyperparameters for the DMPO variants can be found in Table 5.

### B.3 SENSITIVITY TO A FIXED POLICY

Figures 3, 4 and 5 show the sensitivity to perturbations of a fixed RC-D4PG policy on Cartpole, Quadraped and Walker respectively.

### B.4 ROBUSTNESS PERFORMANCE OF D4PG AND DMPO VARIANTS

| <b>Cartpole</b> variables: $x, \theta$ |                                                          |
|----------------------------------------|----------------------------------------------------------|
| Type                                   | Constraint                                               |
| slider_pos                             | $x_l < x < x_r$                                          |
| slider_accel                           | $\ddot{x} < A_{max}$                                     |
| balance_velocity*                      | $ \theta  > \theta_L \vee \dot{\theta} < \dot{\theta}_V$ |

  

| <b>Walker</b> variables: $\theta, u, F$ |                                              |
|-----------------------------------------|----------------------------------------------|
| Type                                    | Constraint                                   |
| joint_angle                             | $\theta_L < \theta < \theta_U$               |
| joint_velocity*                         | $\max_i  \dot{\theta}_i  < L_{\dot{\theta}}$ |
| dangerous_fall                          | $0 < (\mathbf{u}_z \cdot \mathbf{x})$        |
| torso_upright                           | $0 < \mathbf{u}_z$                           |

  

| <b>Quadruped</b> variables: $\theta, u, F$ |                                              |
|--------------------------------------------|----------------------------------------------|
| Type                                       | Constraint                                   |
| joint_angle*                               | $\theta_{L,i} < \theta_i < \theta_{U,i}$     |
| joint_velocity                             | $\max_i  \dot{\theta}_i  < L_{\dot{\theta}}$ |
| upright                                    | $0 < \mathbf{u}_z$                           |
| foot_force                                 | $F_{EE} < F_{max}$                           |

Table 3: Safety constraints available for each RWRL suite domain; the constraints we use in this paper are indicated by an asterisk (\*).

| D4PG Hyperparameters                 | Value       |
|--------------------------------------|-------------|
| Policy net                           | 256-256-256 |
| $\sigma$ (exploration noise)         | 0.1         |
| Critic net                           | 512-512-256 |
| Critic num. atoms                    | 51          |
| Critic vmin                          | -150        |
| Critic vmax                          | 150         |
| N-step transition                    | 5           |
| Discount factor ( $\gamma$ )         | 0.99        |
| Policy and critic opt. learning rate | 0.0001      |
| Replay buffer size                   | 1000000     |
| Target network update period         | 100         |
| Batch size                           | 256         |
| Activation function                  | elu         |
| Layer norm on first layer            | Yes         |
| Tanh on output of layer norm         | Yes         |

Table 4: Hyperparameters for all variants of D4PG.

| DMPO Hyperparameters                | Value       |
|-------------------------------------|-------------|
| Policy net                          | 256-256-256 |
| Number of actions sampled per state | 20          |
| Q function net                      | 512-512-512 |
| Critic num. atoms                   | 51          |
| Critic vmin                         | -150        |
| Critic vmax                         | 150         |
| $\epsilon$                          | 0.1         |
| $\epsilon_\mu$                      | $1e-02$     |
| $\epsilon_\Sigma$                   | $1e-06$     |
| Discount factor ( $\gamma$ )        | 0.99        |
| Adam learning rate                  | $1e-04$     |
| Replay buffer size                  | 1000000     |
| Target network update period        | 100         |
| Batch size                          | 256         |
| Activation function                 | elu         |
| Layer norm on first layer           | Yes         |
| Tanh on output of layer norm        | Yes         |
| Tanh on Gaussian mean               | No          |
| Min variance                        | Zero        |
| Max variance                        | unbounded   |

Table 5: Hyperparameters for all variants of DMPO.

| RWRL Domain: Task | Observation Dimension | Action Dimension |
|-------------------|-----------------------|------------------|
| Cartpole: Swingup | 5                     | 1                |
| Walker: Walk      | 18                    | 6                |
| Quadruped: Walk   | 78                    | 12               |

Table 6: Observation and action dimension for each RWRL domain: task pair.

| Domain    | Variant | Constraint       | Safety coeff | Threshold | Perturbation Type |
|-----------|---------|------------------|--------------|-----------|-------------------|
| Cartpole  | Swingup | Balance Velocity | 0.3          | 0.115     | Slider Damping    |
| Cartpole  | Swingup | Balance Velocity | 0.3          | 0.115     | Joint Damping     |
| Cartpole  | Swingup | Balance Velocity | 0.3          | 0.115     | Pole Mass         |
| Quadruped | Walk    | Joint Angle      | 0.3          | 0.7       | Shin Length       |
| Walker    | Walk    | Joint Velocity   | 0.3          | 0.1       | Thigh Length      |
| Walker    | Walk    | Joint Velocity   | 0.3          | 0.1       | Torso Length      |

Table 7: The full list of the tasks we defined from the Real World RL Suite.

| Domain    | Perturbation Type | Nom. Val. | Training Uncertainty Set | Holdout Set                                                    |
|-----------|-------------------|-----------|--------------------------|----------------------------------------------------------------|
| Cartpole  | Joint Damping     | 0.0       | [0.0, 0.005, 0.01]       | [0.0025, 0.007, 0.008, 0.009, 0.015, 0.02, 0.025, 0.03, 0.035] |
|           | Slider Damping    | 0.001     | [0.001, 1.7, 1.9]        | [1.0, 1.4, 1.6, 1.8, 2.1, 2.3, 2.4, 2.5, 2.6]                  |
|           | Pole Mass         | 0.1       | [0.1, 0.2, 0.5]          | [0.05, 0.15, 0.25, 0.35, 0.45, 0.55, 0.6, 0.7, 0.8]            |
| Quadruped | Shin Length       | 0.25      | [0.25, 0.625, 0.70]      | [0.85, 0.88, 0.92, 0.96, 1.0, 1.04, 1.08, 1.12, 1.16, 1.2]     |
| Walker    | Thigh Length      | 0.225     | [0.225, 0.20, 0.17]      | [0.21, 0.19, 0.185, 0.175, 0.165, 0.155, 0.152, 0.15, 0.148]   |
|           | Torso Length      | 0.3       | [0.3, 0.32, 0.34]        | [0.42, 0.43, 0.45, 0.47, 0.49, 0.51, 0.53, 0.55, 0.57]         |

Table 8: Final experiment parameters.

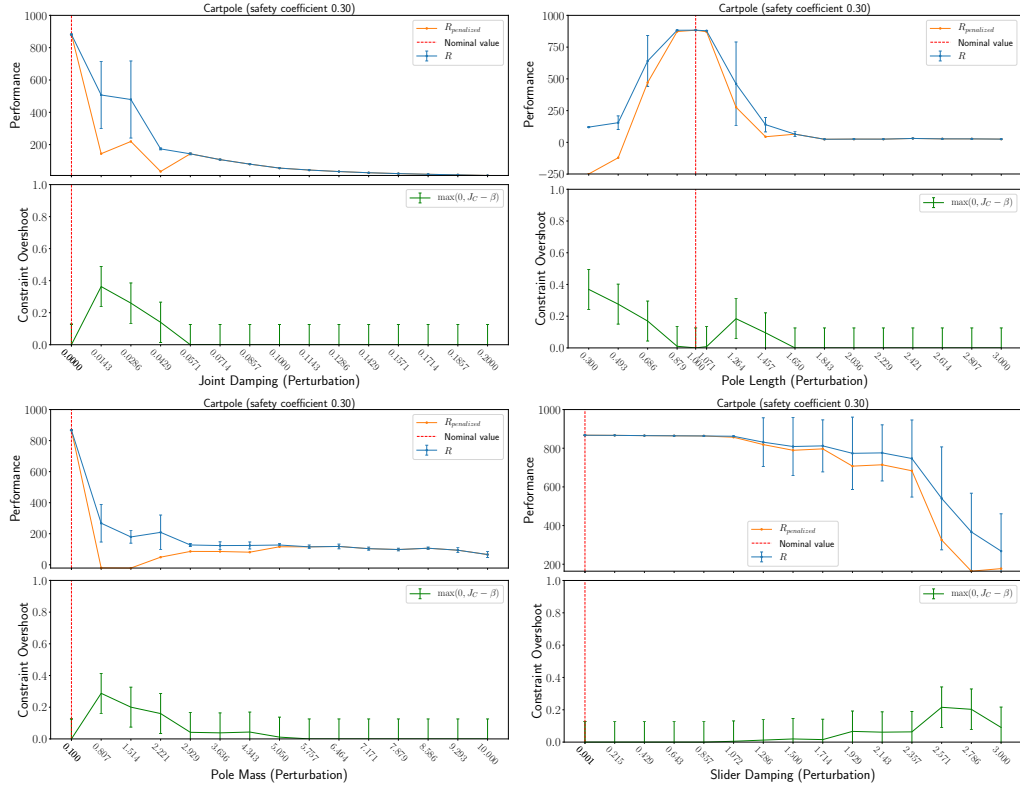

Figure 3: The effect on constraint satisfaction and return as perturbations are added to cartpole for a fixed C-D4PG policy.

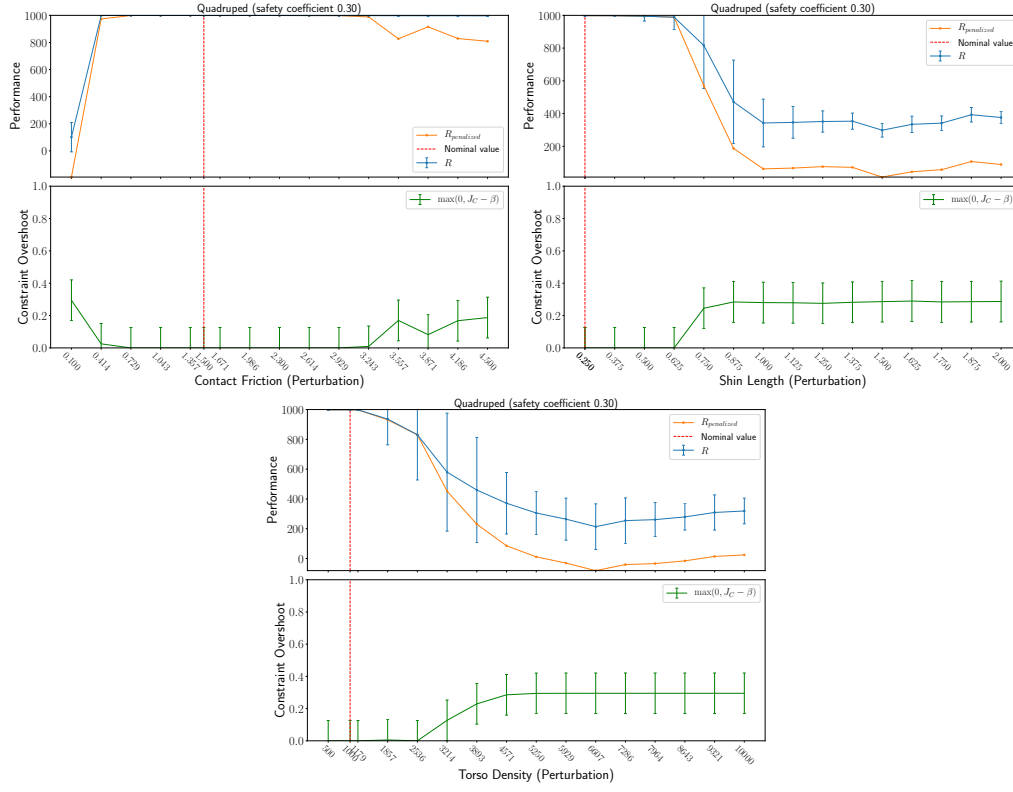

Figure 4: The effect on constraint satisfaction and return as perturbations are added to quadruped for a fixed C-D4PG policy.



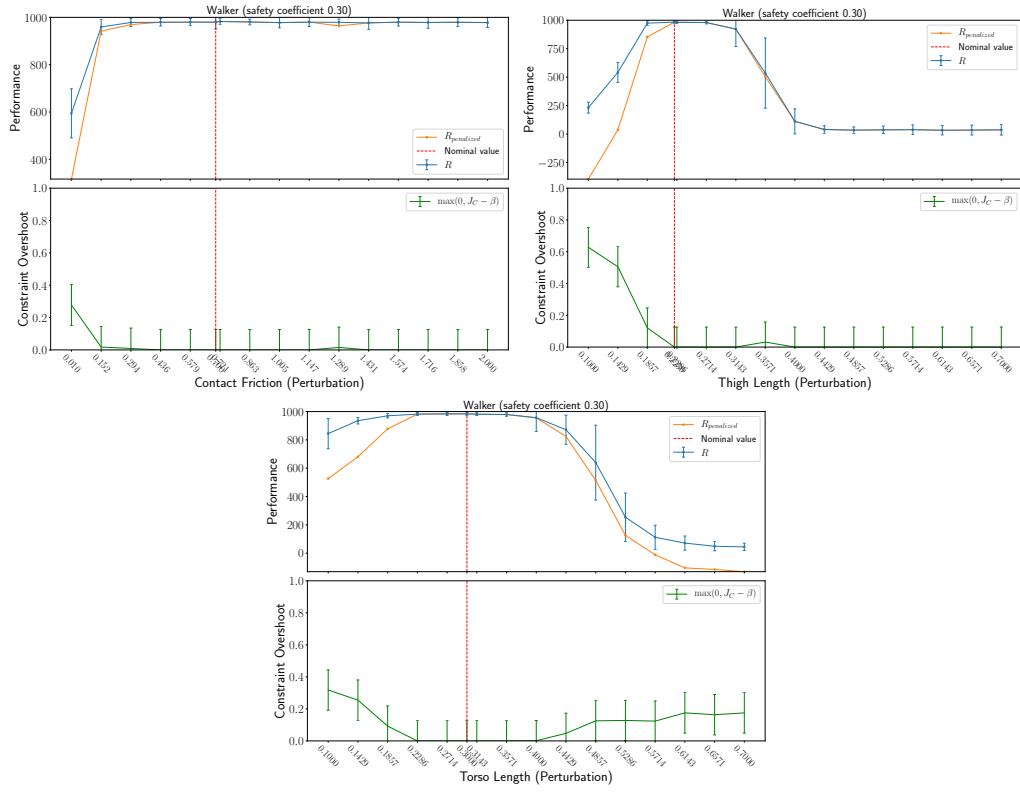

Figure 5: The effect on constraint satisfaction and return as perturbations are added to walker for a fixed C-D4PG policy.

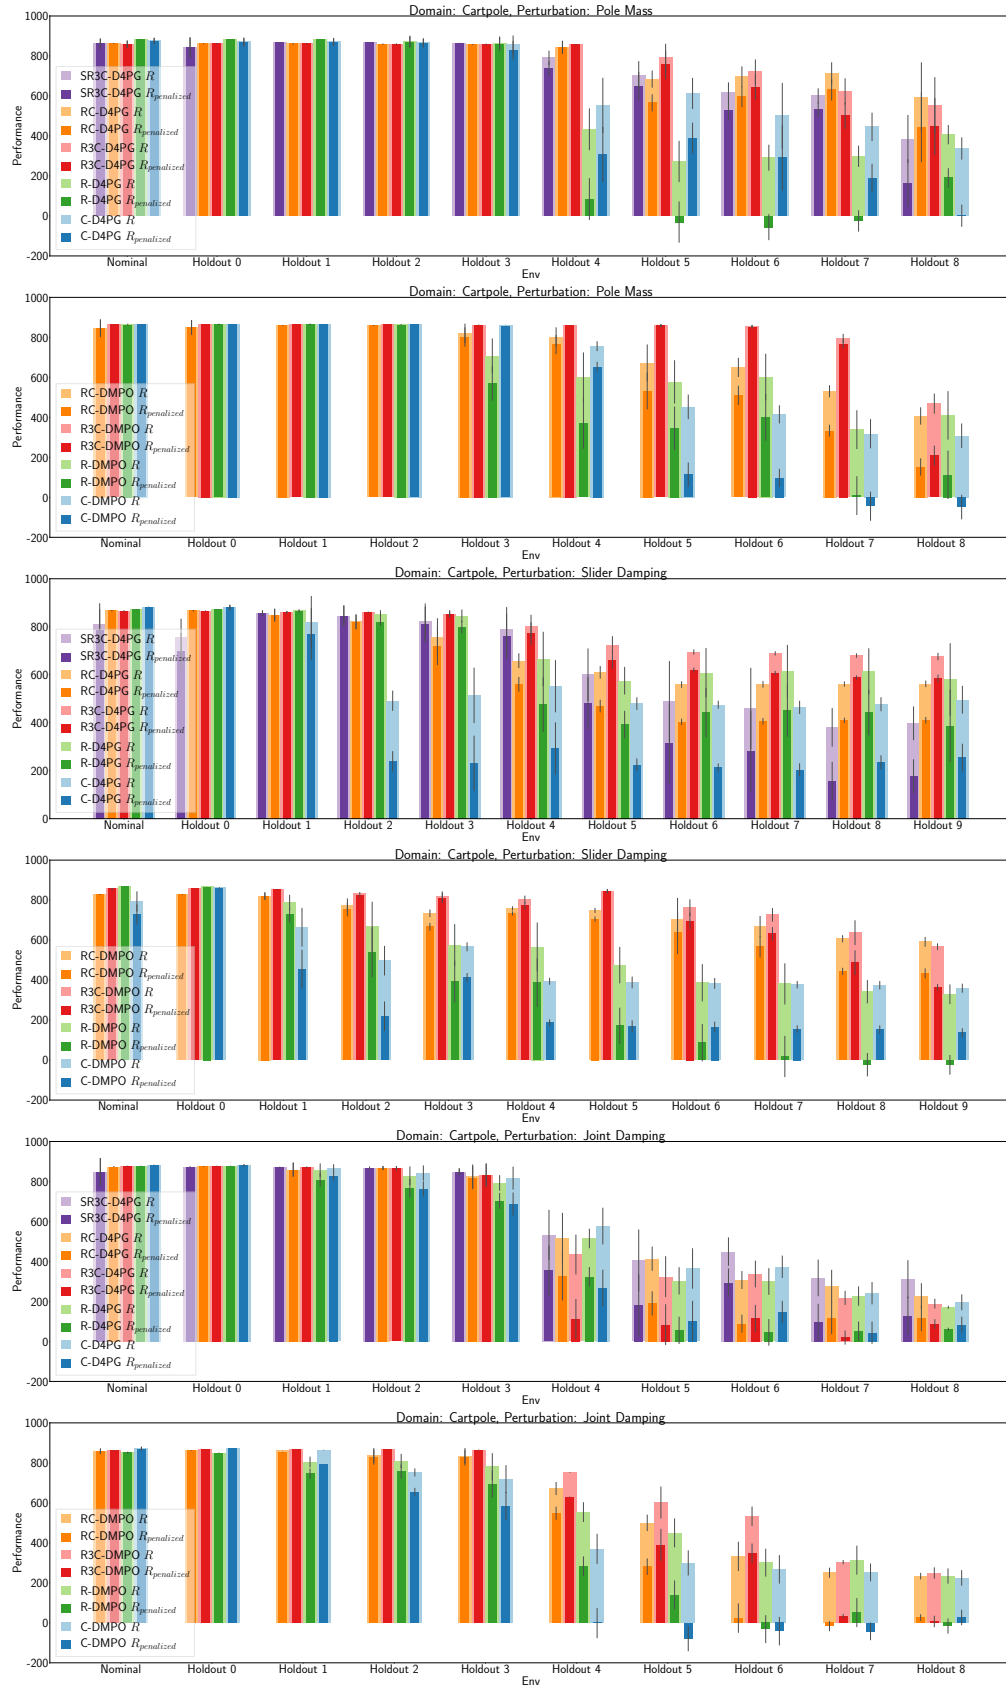

Figure 6: The robustness performance of the D4PG variants per task (row).

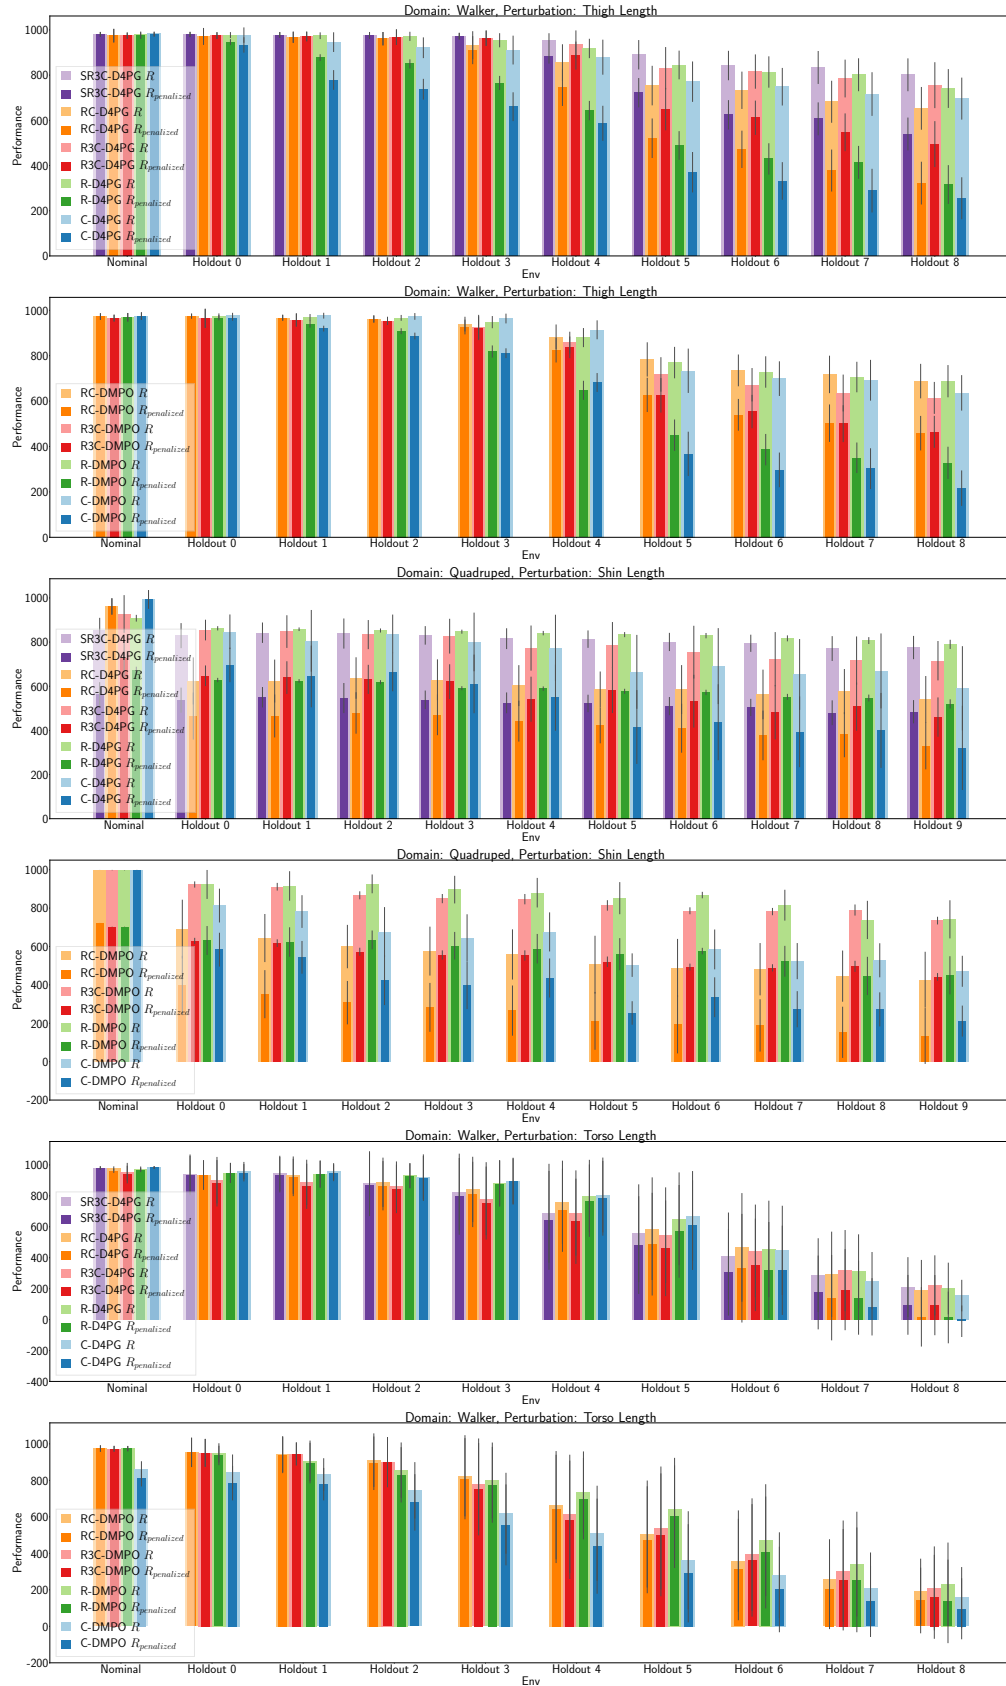

Figure 7: The robustness performance of the DMPO variants per task (row).
